# Supplementary figures and images for: Activity and diversity of methane-oxidizing bacteria in glacier forefields on siliceous and calcareous bedrock
Source: Copernicus journal article supplement (doi:10.5194/bg-9-2259-2012), 2012-06-25

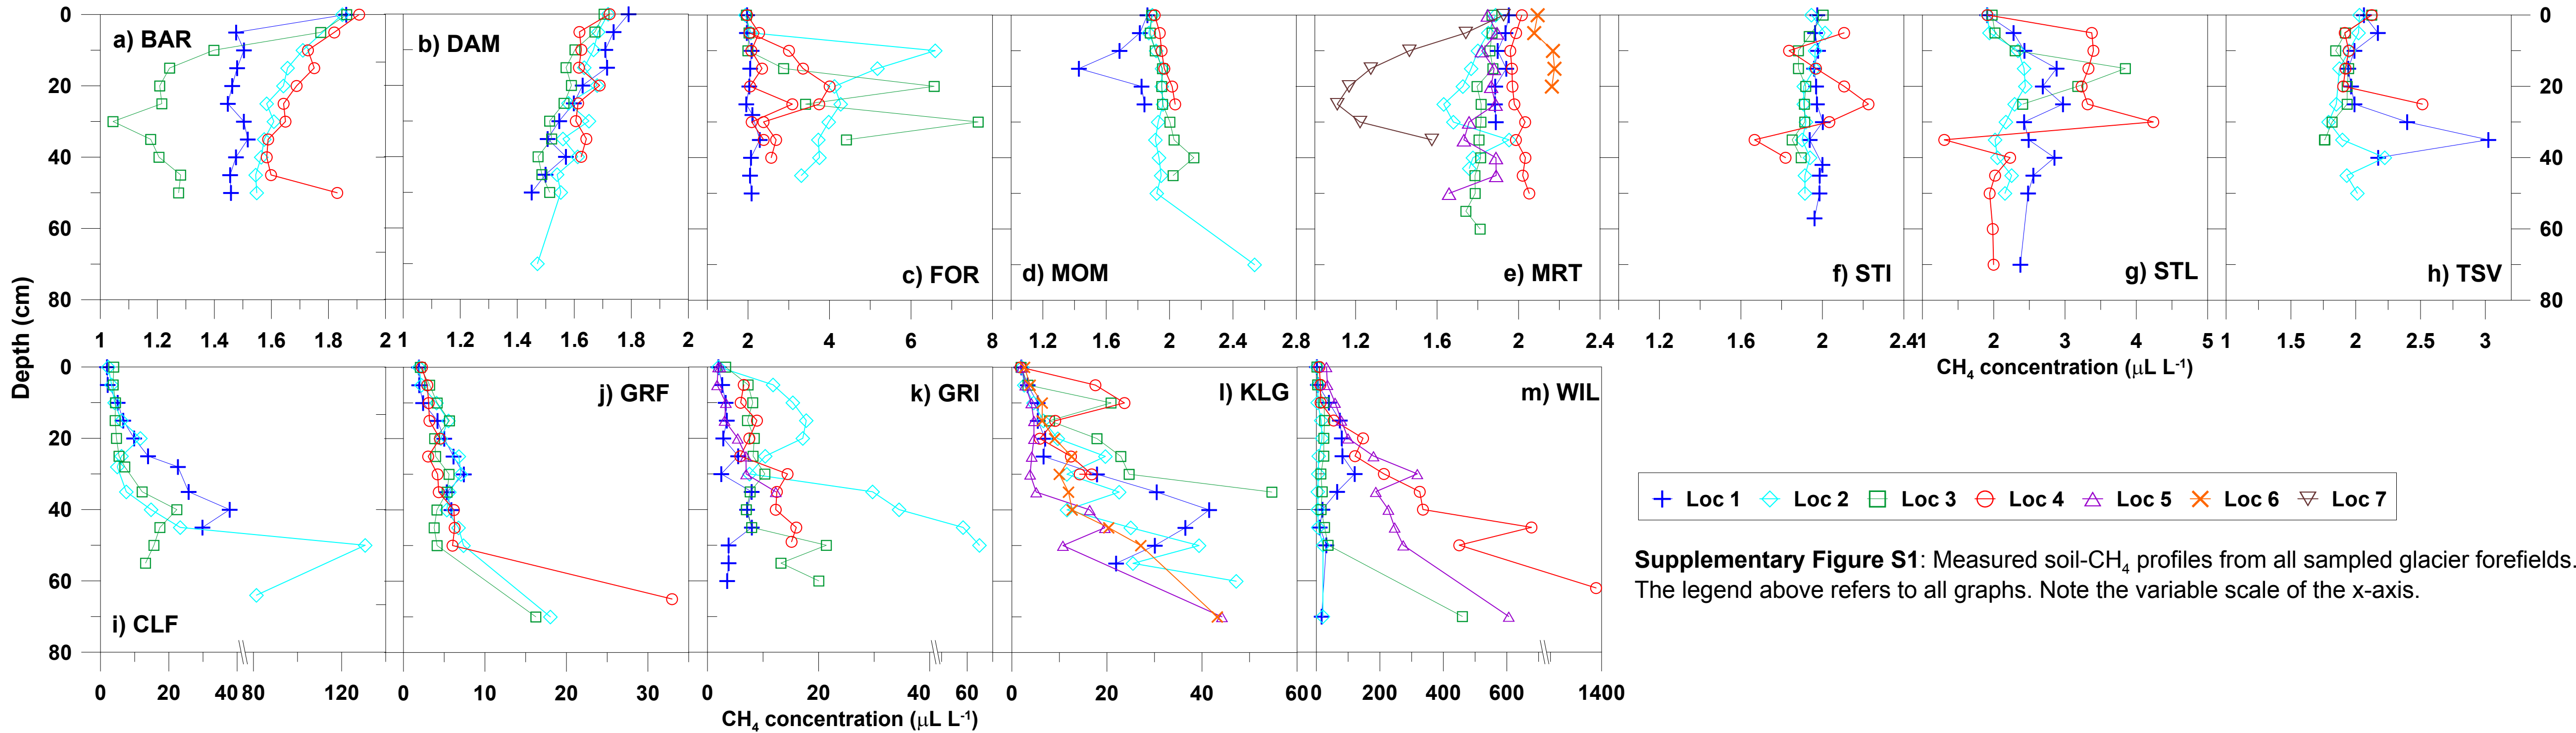

Supplement: Supplementary file 1 [file Supplementary Figure S1.pdf › Supplementary Figure S1.pdf]
